# Supplementary material
Source: ML conference proceedings conference paper supplement (https://openreview.net/forum?id=7WuCttgNQ79)
Supplement: supplementary_material [file attachment]

---

# Scaling Multimodal Pre-Training via Cross-Modality Gradient Harmonization Supplementary Material

---

## 1 Qualitative examples of our proposed measure based on agreement of gradients

To further validate the conjecture that *aligned video-text-audio triplets should have higher cosine similarity for  $g_{va}$  and  $g_{vt}$ , and vice versa*, we conduct a sanity check, where we started from a pre-trained VATT network and further optimize it for 200 iterations with a batch size of 64 on Youtube8M dataset, we then randomly sample video-text-audio triplets out of the samples with top 5% and bottom 5% most aligned gradient, measured by  $\cos(g'_{va}, g'_{va})$ . In Figure 1 and 2, we visually observed that the top 5% group triplets has more semantically aligned words in the corresponding text narration (highlighted in **green**) thus enjoy a better cross-modality alignment, while the bottom 5% group triplets has fewer semantically aligned words, therefore are much more noisy in their alignments.

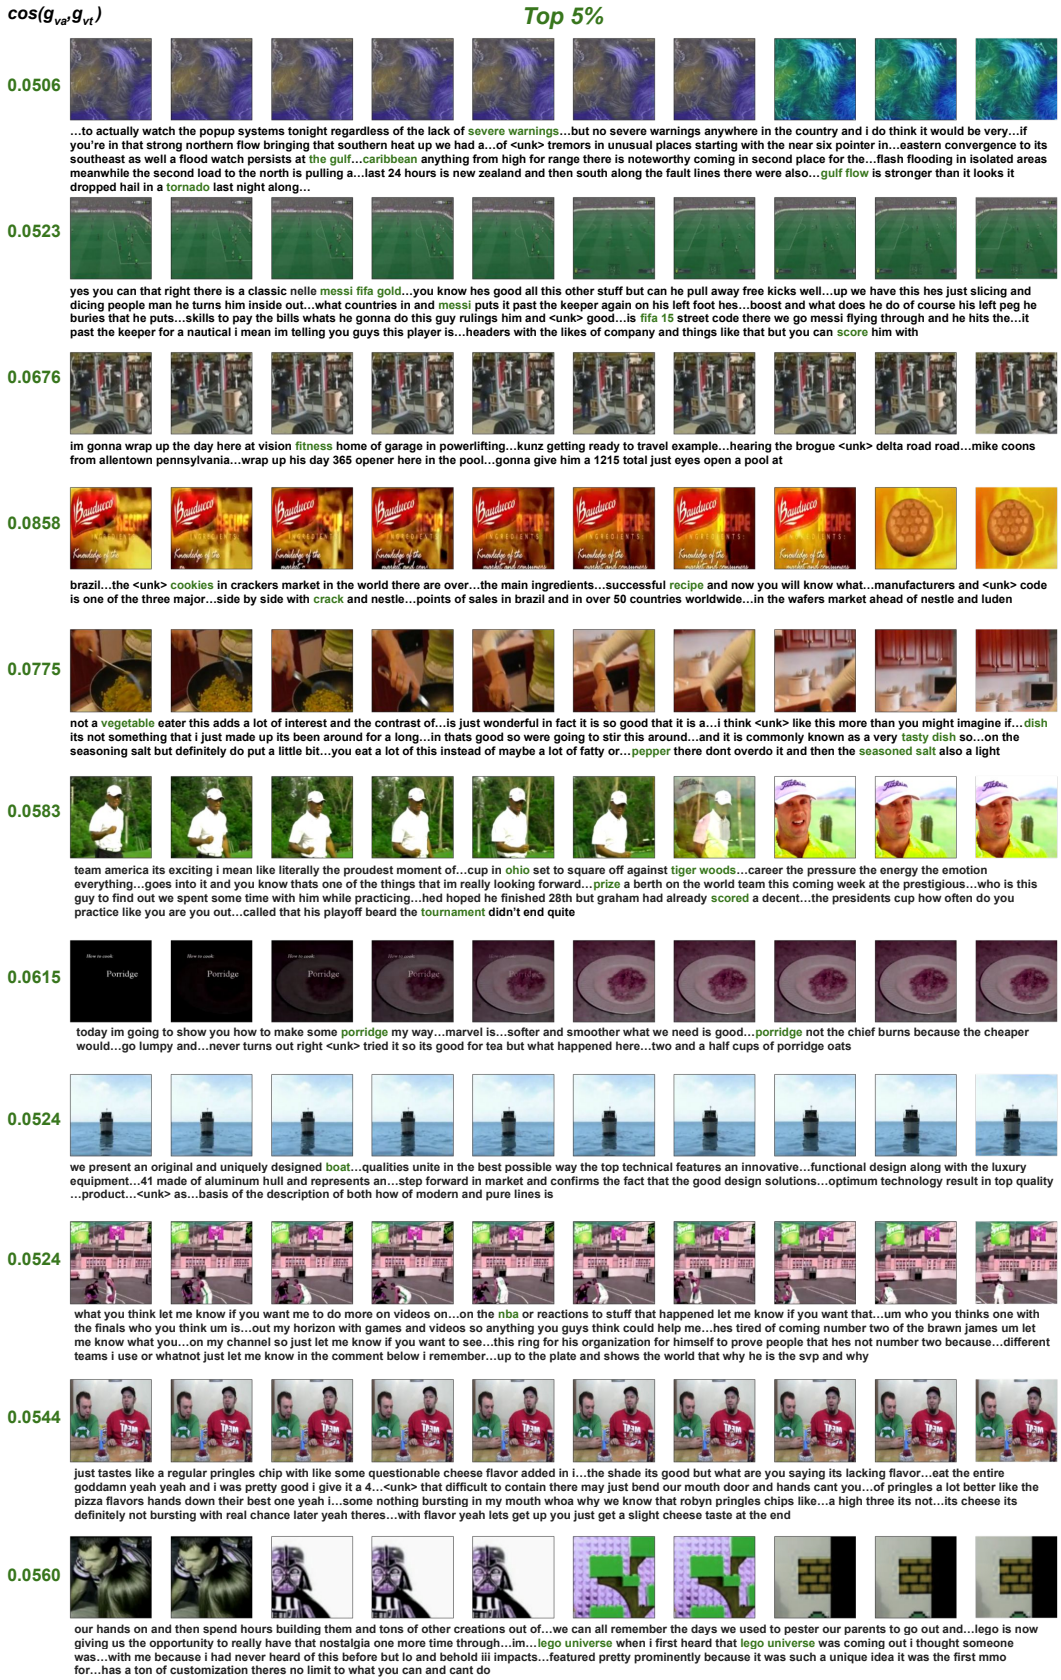

Figure 1: Visualization of Top 5% examples measured by the agreement of gradients on Youtube8M dataset, semantically aligned text are highlighted in green,  $\cos(g_{va}, g_{vt})$  reflect the agreement between  $g_{va}$  and  $g_{vt}$ , by measuring their cosine similarity.

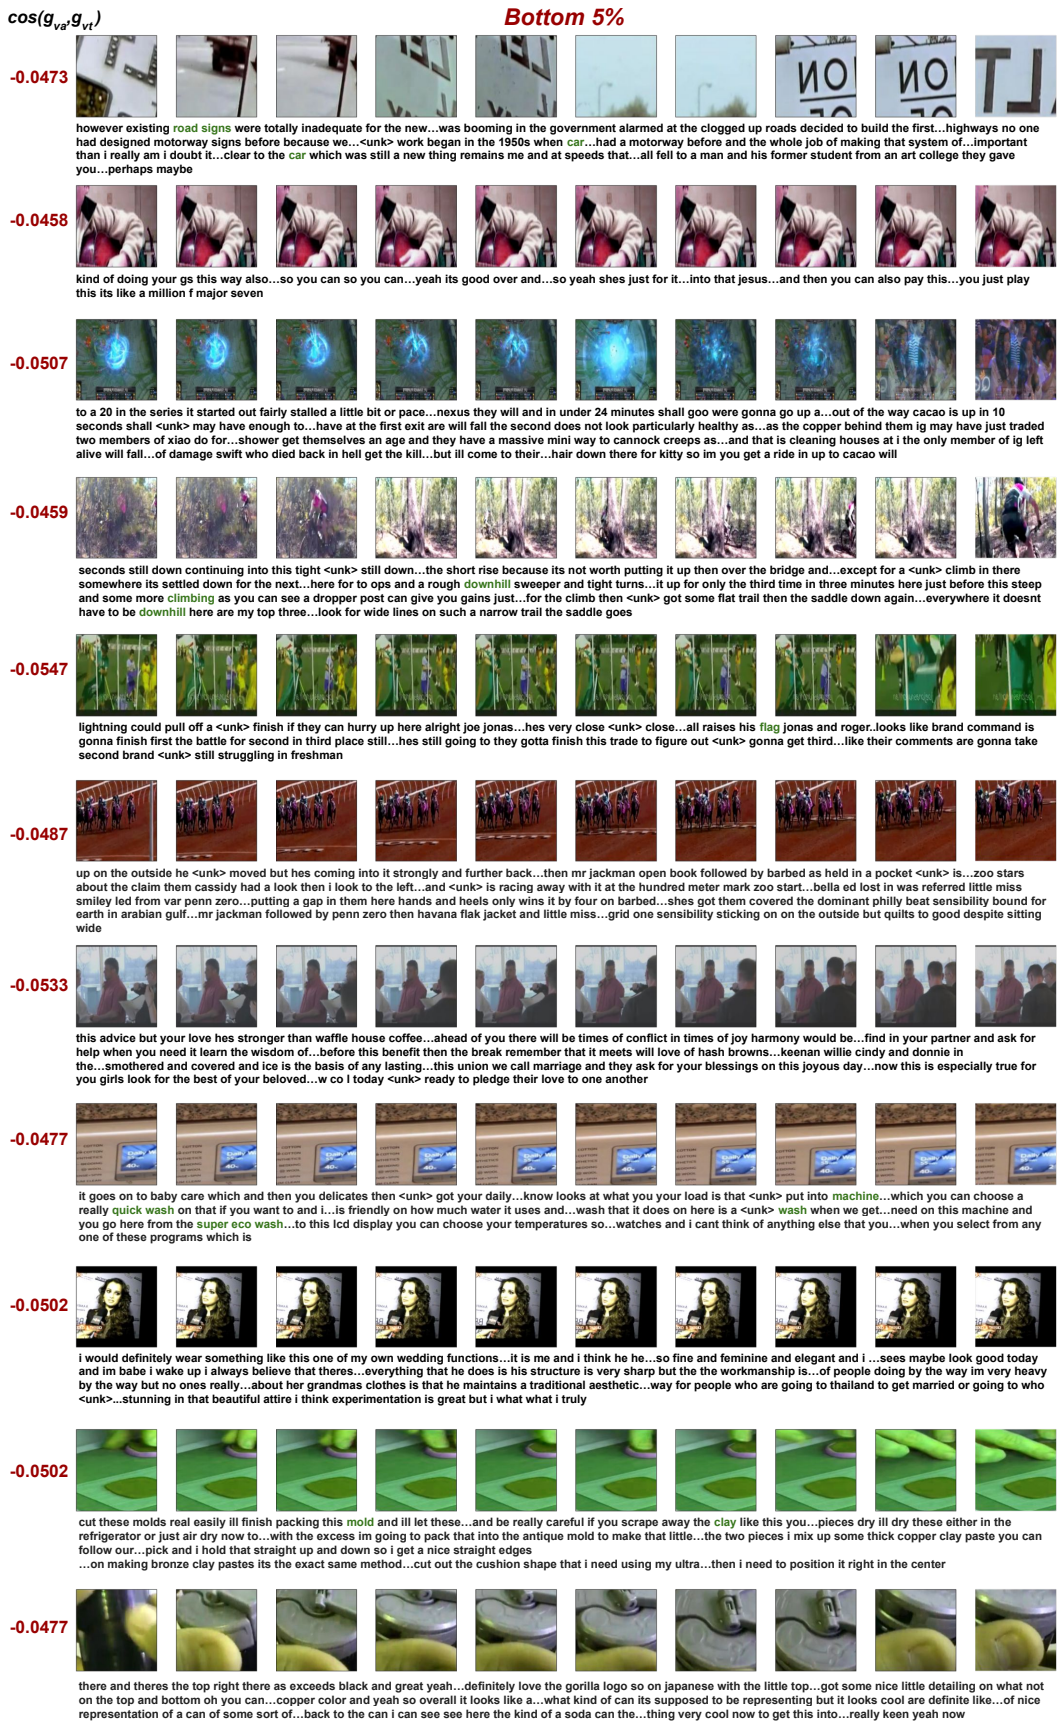

Figure 2: Visualization of Bottom 5% examples measured by the agreement of gradients on Youtube8M dataset, semantically aligned text are highlighted in green,  $\cos(g_{va}, g_{vt})$  reflect the agreement of between  $g_{va}$  and  $g_{vt}$ , by measuring their cosine similarity.

## 2 Training dynamics of our proposed measure on Youtube8M dataset

In Figure 3, we plot the distribution of cosine similarities,  $\cos(g_{va}, g_{va})$ , across 500k iterations of pre-training, on the noisy Youtube8M dataset. We observe that  $\cos(g_{va}, g_{va})$  at any iteration resembles a normal distribution, and about half of the gradients  $g_{va}$  and  $g_{va}$  have misaligned directions (negative cosine similarities). We also calculate the mean of  $\cos(g_{va}, g_{va})$  across all 500k iterations on Youtube8M dataset, and found it to be 30% smaller than that on Howto100M dataset, indicating stronger mis-alignment in gradient directions on Youtube8M, which further verify that non-narrative video sets such as Youtube8M have more severe misalignment than the narrative ones such as Howto100M, hence challenging the CMA assumption commonly used in multimodal pre-training[? ? ].

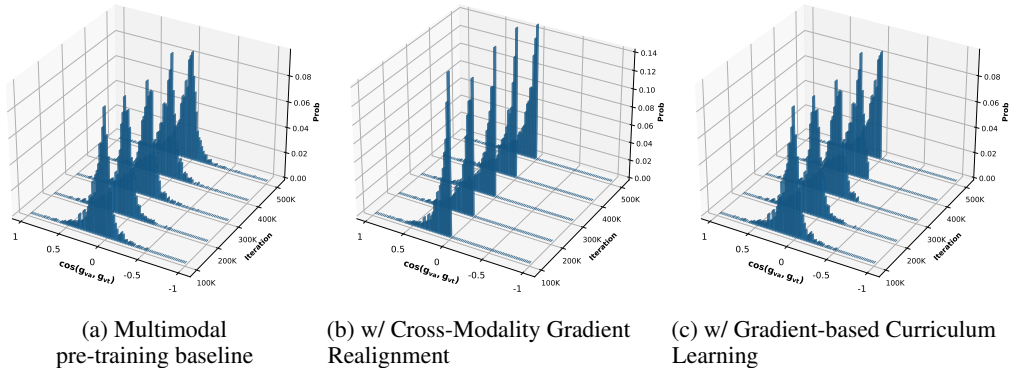

Figure 3: Visualization of cosine similarity between gradient  $g_{va}$  and  $g_{vt}$  across 500K Iterations on the Youtube8M dataset. (a) shows the baseline setting in multimodal pre-training; (b) with only cross-modality gradient realignment; (c) with only gradient-based curriculum learning.
